# Supplementary material for: Phonon and magnetoelastic coupling in Al0.5Ga0.5FeO3: Raman, magnetization and neutron diffraction studies
Source: Royal Society of Chemistry journal article supplement (doi:10.1039/c9cp06124j), 2020-01-01
Supplement: c9cp06124j1.pdf [file c9cp06124j1.pdf]

## Phonon and magnetoelastic coupling in $\text{Al}_{0.5}\text{Ga}_{0.5}\text{FeO}_3$ : Raman, magnetization and neutron diffraction studies

*K. K. Mishra,<sup>a</sup> R. Shukla,<sup>b</sup> P. S. R. Krishna,<sup>c</sup> P. D. Babu,<sup>d</sup> S. N. Achary,<sup>b</sup> R. S. Katiyar,<sup>a</sup> J. F. Scott<sup>a,e</sup>*

*<sup>a</sup>Department of Physics and Institute for Functional Nanomaterials, P.O. Box 70377, University of Puerto Rico, San Juan, PR 00936-8377, USA*

*<sup>b</sup>Chemistry Division, Bhabha Atomic Research Centre, Mumbai, 400085*

*<sup>c</sup>Solid State Physics Division, Bhabha Atomic Research Centre, Mumbai, 400085*

*<sup>d</sup>UGC-DAE-CSR Consortium, Mumbai, 400085*

*<sup>a,e</sup>School of Physics, University of St. Andrews, St. Andrews, United Kingdom KY19 9SS*

### Supplementary information

**S1.** EDAX spectrum of the sample shows presence of all elements against their respective energy level. The inset shows SEM micrograph of fractured surface of the sintered pellet (b) Elemental mapping of the sample and distribution maps of each element (b-i) Al, (b-ii) Ga, (b-iii) Fe and (b-iv) O.

**S2.** Variations of unit cell parameters with temperature. The variation in the complete range of temperature can be fitted with the second order polynomial as given below.

$$a (\text{\AA}) = 8.6332(7) + 2.5(5) \times 10^{-5} [T] + 4.0(6) \times 10^{-8} [T]^2$$

$$b (\text{\AA}) = 9.3137(6) + 1.9(4) \times 10^{-5}[T] + 5.9(5) \times 10^{-8} [T]^2$$

$$c (\text{\AA}) = 5.0211(6) + 1.6(4) \times 10^{-5} [T] + 3.1(5) \times 10^{-8} [T]^2$$

$$V (\text{\AA})^3 = 403.73(8) + 3.2(5) \times 10^{-3} [T] + 7.0(7) \times 10^{-6} [T]^2,$$

where T = temperature in K

**S3.** XPS spectrum deconvoluted to obtain contribution of  $\text{Fe}^{2+}$  and  $\text{Fe}^{3+}$  chemical states using a Shirley background.

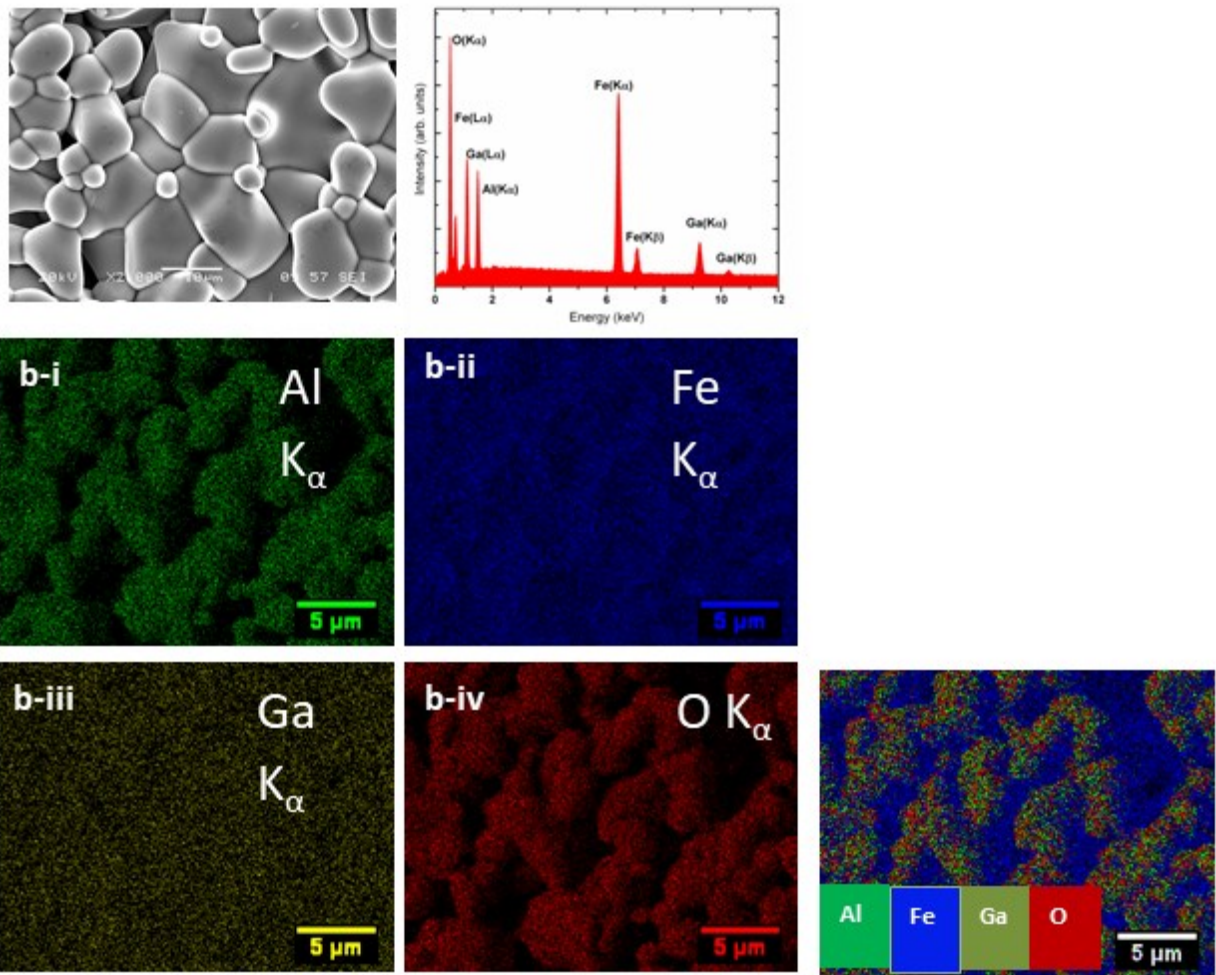

**S1.** EDS spectrum of the sample shows presence of all elements against their respective energy level. The inset shows SEM micrograph of fractured surface of the sintered pellet(b) Elemental mapping of the sample and distribution maps of each element (b-i) Al, (b-ii) Ga, (b-iii) Fe and (b-iv) O.

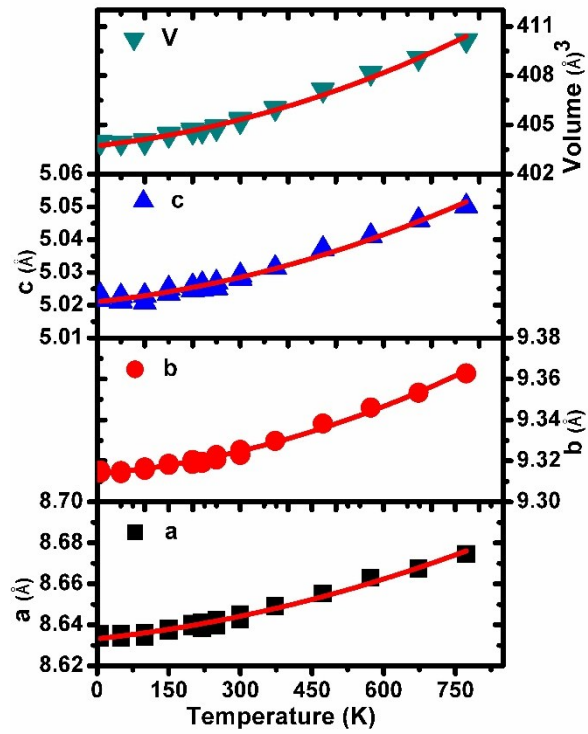

**S2.** Variations of unit cell parameters with temperature. The variation in the complete range of temperature can be fitted with the second order polynomial as given below.

$$a (\text{\AA}) = 8.6332(7) + 2.5(5) \times 10^{-5} [T] + 4.0(6) \times 10^{-8} [T]^2$$

$$b (\text{\AA}) = 9.3137(6) + 1.9(4) \times 10^{-5}[T] + 5.9(5) \times 10^{-8} [T]^2$$

$$c (\text{\AA}) = 5.0211(6) + 1.6(4) \times 10^{-5} [T] + 3.1(5) \times 10^{-8} [T]^2$$

$$V (\text{\AA})^3 = 403.73(8) + 3.2(5) \times 10^{-3} [T] + 7.0(7) \times 10^{-6} [T]^2$$

Where T is the temperature in K.

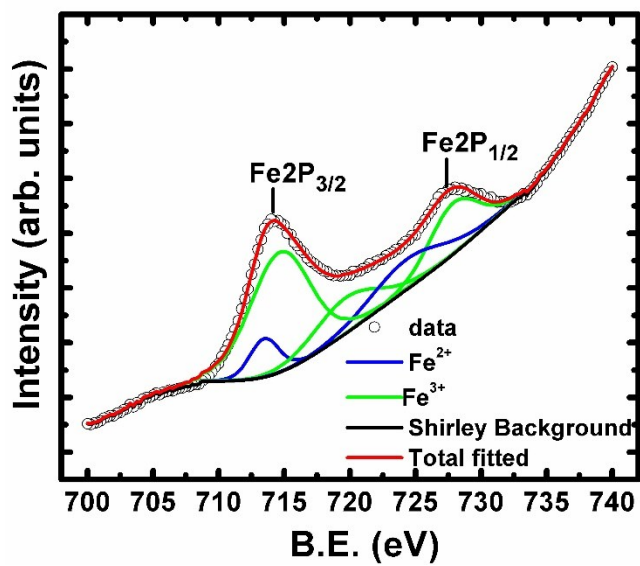

S3. XPS spectrum deconvoluted to obtain contribution of Fe<sup>2+</sup> and Fe<sup>3+</sup> chemical states using a Shirley background.
